# Supplementary material
Source: HighWire-hosted journal article supplement (https://heart.bmj.com/content/109/22/1670)
Supplement: inline-supplementary-material-1 [file inline-supplementary-material-1.pdf]

| <b>Supplementary Table. Selected ancillary tests for further ophthalmic investigation.</b> |                                                                                                                                                                                                                |
|--------------------------------------------------------------------------------------------|----------------------------------------------------------------------------------------------------------------------------------------------------------------------------------------------------------------|
| <b>Test</b>                                                                                | <b>Description</b>                                                                                                                                                                                             |
| Refraction                                                                                 | Used to determine the patient's need for refractive correction (in the form of glasses or contact lenses)                                                                                                      |
| Fluorescein staining                                                                       | To detect injuries such as corneal abrasions and foreign bodies                                                                                                                                                |
| Schirmer's test                                                                            | Done to assess dry eyes or excessive tearing. Involves inserting test paper between the middle and outer third of the lower lid                                                                                |
| Fundus fluorescein angiography                                                             | Allows visualization of the fundus following intravenous injection of sodium fluorescein. Sodium fluorescein is an organic water-soluble dye, aiding in visualization of the choroidal and retinal vasculature |
| Optical coherence tomography                                                               | Provides high-resolution images of the neurosensory retina in a non-invasive manner using light waves                                                                                                          |
